# Supplementary material
Source: HighWire-hosted journal article supplement (https://www.annfammed.org/highwire/filestream/14894/field_highwire_adjunct_files/0/MitchellSuppApps.pdf)
Supplement: MitchellSuppApps.pdf [file MitchellSuppApps.pdf]

Supplemental materials for:

Mitchell SE, Reichert M, Martin Howard J, et al. Reducing readmission of hospitalized patients with depressive symptoms: a randomized trial. *Ann Fam Med*. 2022;20(3):246-254.

## Supplemental Tables 1-8 and Supplemental Figures 1 and 2

**Supplemental Table 1. Multiple Imputation Results**

| Primary Outcomes - ITT |       |      |         |
|------------------------|-------|------|---------|
| Outcome                | Coef  | SE   | P Value |
| 30-Day Readmissions    | -0.14 | 0.26 | 0.594   |
| 30-Day Reutilizations  | 0.12  | 0.15 | 0.421   |
| 90-Day Readmissions    | 0.21  | 0.15 | 0.174   |
| 90-Day Reutilizations  | 0.19  | 0.10 | 0.067   |

| Secondary Outcomes – ITT |       |      |         |
|--------------------------|-------|------|---------|
| Outcome                  | Coef  | SE   | P Value |
| 30-Day PHQ-9             | -1.11 | 0.54 | 0.044   |
| 30-Day GAD-7             | -0.79 | 0.52 | 0.129   |
| 30-Day Q-LES-Q-SF        | 2.17  | 1.86 | 0.251   |
| 30-Day PAM-13            | 0.92  | 0.4  | 0.021   |
| 90-Day PHQ-9             | -0.54 | 0.59 | 0.366   |
| 90-Day GAD-7             | -0.06 | 0.71 | 0.932   |
| 90-Day Q-LES-Q-SF        | 1.58  | 2.14 | 0.47    |
| 90-Day PAM-13            | 0.58  | 0.47 | 0.22    |

| Secondary Outcomes – As-Treated |       |      |         |
|---------------------------------|-------|------|---------|
| Outcome                         | Coef  | SE   | P Value |
| 30-Day PHQ-9                    | -0.34 | 0.27 | 0.224   |
| 30-Day GAD-7                    | -0.34 | 0.26 | 0.231   |
| 30-Day Q-LES-Q-SF               | 0.49  | 1.07 | 0.663   |
| 30-Day PAM-13                   | 0.09  | 0.47 | 0.849   |
| 90-Day PHQ-9                    | -0.34 | 0.27 | 0.224   |
| 90-Day GAD-7                    | -0.34 | 0.26 | 0.231   |
| 90-Day Q-LES-Q-SF               | 0.49  | 1.07 | 0.663   |
| 90-Day PAM-13                   | 0.09  | 0.47 | 0.849   |

| Primary Outcomes – As-Treated |       |      |         |
|-------------------------------|-------|------|---------|
| Outcome                       | Coef  | SE   | P Value |
| 30-Day Readmissions           | -0.24 | 0.13 | 0.094   |
| 30-Day Reutilizations         | -0.06 | 0.08 | 0.43    |
| 90-Day Readmissions           | -0.08 | 0.03 | 0.037   |
| 90-Day Reutilizations         | -0.05 | 0.03 | 0.17    |

Tables for ITT outcomes show coefficients, standard errors, and p-values from OLS regressions of 30-day and 90-day outcomes on study arm. Tables for as-treated outcomes show coefficients, standard errors, and p-values for 30- and 90-day outcomes on the number of sessions completed amongst intervention subjects only.

## Supplemental Table 2. Robustness to Selection Effects: Impact of Number of Sessions (<3 vs. ≥3) of the Telephonic Intervention on Clinical and Demographic Variables at 30 and 90 Days

30 d after index hospitalization

|                   | Fewer than 3 Doses of RED-D |     |                          | 3 or More Doses of RED-D |     |                          | p-value<br>(dose vs. dose) |
|-------------------|-----------------------------|-----|--------------------------|--------------------------|-----|--------------------------|----------------------------|
|                   | mean (SD)                   | n   | p-value<br>(vs. control) | mean (SD)                | n   | p-value<br>(vs. control) |                            |
| PHQ-9 (baseline)  | 14.87 (3.95)                | 223 | 0.106                    | 15.54 (4.66)             | 105 | 0.843                    | 0.207                      |
| MDD               | 0.39 (0.50)                 | 141 | 0.001                    | 0.49 (0.49)              | 73  | 0.136                    | 0.220                      |
| GAD-7 (baseline)  | 10.25 (5.74)                | 214 | 0.112                    | 10.62 (5.86)             | 101 | 0.496                    | 0.599                      |
| PAM-13 (baseline) | 41.86 (5.48)                | 223 | 0.777                    | 41.08 (5.40)             | 105 | 0.288                    | 0.224                      |
| Education         | 4.39 (2.70)                 | 223 | 0.721                    | 4.57 (2.90)              | 105 | 0.419                    | 0.604                      |
| Income            | 7.05 (4.04)                 | 223 | 0.338                    | 6.46 (3.90)              | 105 | 0.573                    | 0.214                      |
| Gender            | 0.38 (0.49)                 | 223 | 0.185                    | 0.27 (0.45)              | 105 | 0.283                    | 0.047                      |
| Age               | 48.94 (13.76)               | 223 | 0.042                    | 53.17 (12.51)            | 105 | 0.215                    | 0.006                      |

90 d after index hospitalization

|                               | Fewer than 6 Doses of RED-D |     |                          | 6 or More Doses of RED-D |     |                          | p-value<br>(dose vs. dose) |
|-------------------------------|-----------------------------|-----|--------------------------|--------------------------|-----|--------------------------|----------------------------|
|                               | mean (SD)                   | n   | p-value<br>(vs. control) | mean (SD)                | n   | p-value<br>(vs. control) |                            |
| PHQ-9 (baseline)              | 15.01 (4.04)                | 207 | 0.340                    | 15.32 (4.45)             | 110 | 0.931                    | 0.549                      |
| MDD by interview <sup>1</sup> | 0.42 (0.51)                 | 126 | 0.003                    | 0.45 (0.53)              | 81  | 0.036                    | 0.648                      |
| GAD-7 (baseline)              | 10.51 (5.71)                | 197 | 0.333                    | 10.40 (5.85)             | 107 | 0.346                    | 0.876                      |
| PAM-13 (baseline)             | 41.53 (5.48)                | 207 | 0.715                    | 41.63 (5.49)             | 110 | 0.895                    | 0.878                      |
| Education                     | 4.35 (2.67)                 | 207 | 0.790                    | 4.72 (2.92)              | 110 | 0.180                    | 0.283                      |
| Income                        | 6.91 (4.03)                 | 207 | 0.468                    | 6.68 (3.93)              | 110 | 0.943                    | 0.627                      |
| Gender                        | 0.36 (0.48)                 | 207 | 0.409                    | 0.33 (0.47)              | 110 | 0.909                    | 0.608                      |
| Age                           | 47.90 (13.58)               | 207 | 0.007                    | 53.95 (12.28)            | 110 | 0.049                    | 0.000                      |

# **Supplemental FIGURE 1. Secondary Outcomes: PHQ-9, GAD-7, PAM, and Q-LES-Q-SF Among Subjects Receiving $\geq 6$ sessions at 90 days, $< 6$ sessions at 90 days and Controls\***

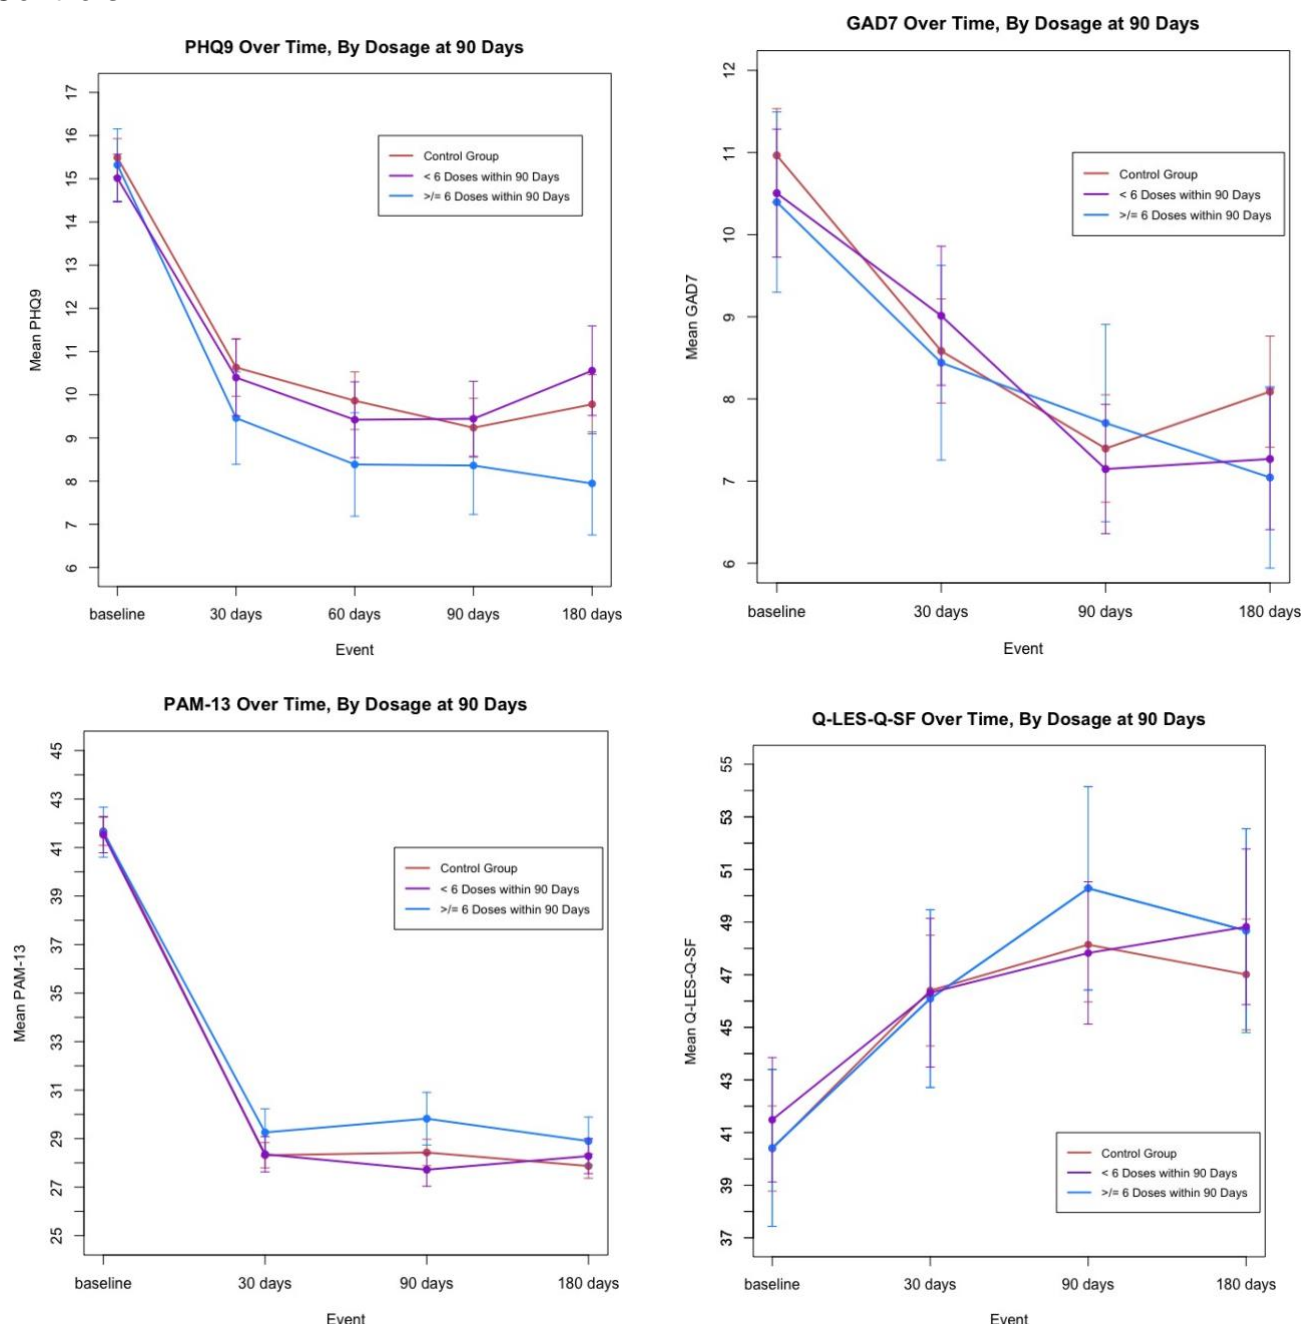

## **Footnotes for Supplemental Figure 1**

- \* Figures show the mean PHQ-9, GAD-7, PAM-13, and Q-LES-Q-SF scores and 95% confidence intervals at 0, 30, 90, and 180 days (and 60 days for PHQ-9 score) for controls, intervention patients receiving  $< 6$  sessions and intervention patients receiving  $\geq 6$  sessions within 90 days of hospital discharge.
- † PHQ-9. Patient Health Questionnaire-9 is a nine item scale. A score of  $\geq 10$  indicates moderate depressive symptoms.<sup>16</sup>
- ‡ Q-LES-Q-SF. Quality of Life Enjoyment and Satisfaction Questionnaire Short Form is a 16 item scale indicating the degree of enjoyment and satisfaction experienced by subjects in various areas of daily functioning. The reported

score is the sum of the question responses rescaled to 100. Higher scores indicate higher enjoyment and satisfaction.<sup>21</sup>

- \*\* GAD-7. Generalized Anxiety Disorder 7 is a 7 item scale. A score of 10-14 indicates possible clinically significant generalized anxiety and  $\geq 15$  indicates that treatment is probably warranted.<sup>23</sup>
- † PAM-13. Patient Activation Measure 13 is a 13 item scale indicating the degree of patients' willingness and ability to take independent actions to manage their health and care. Raw scores converted to range from 0–100 with  $\leq 47.0$  not believing activation important; 47.1–55.1 indicating a lack of knowledge and confidence to take action; 55.2–67.0 beginning to take action; and  $\geq 67.1$  taking action.<sup>22</sup>

## Supplemental Figure 2. Secondary Outcomes: PHQ-9, GAD-7, PAM, and Q-LES-Q-SF Among Subjects Receiving $\geq 3$ sessions at 30 days, $< 3$ sessions at 30 days and Controls\*

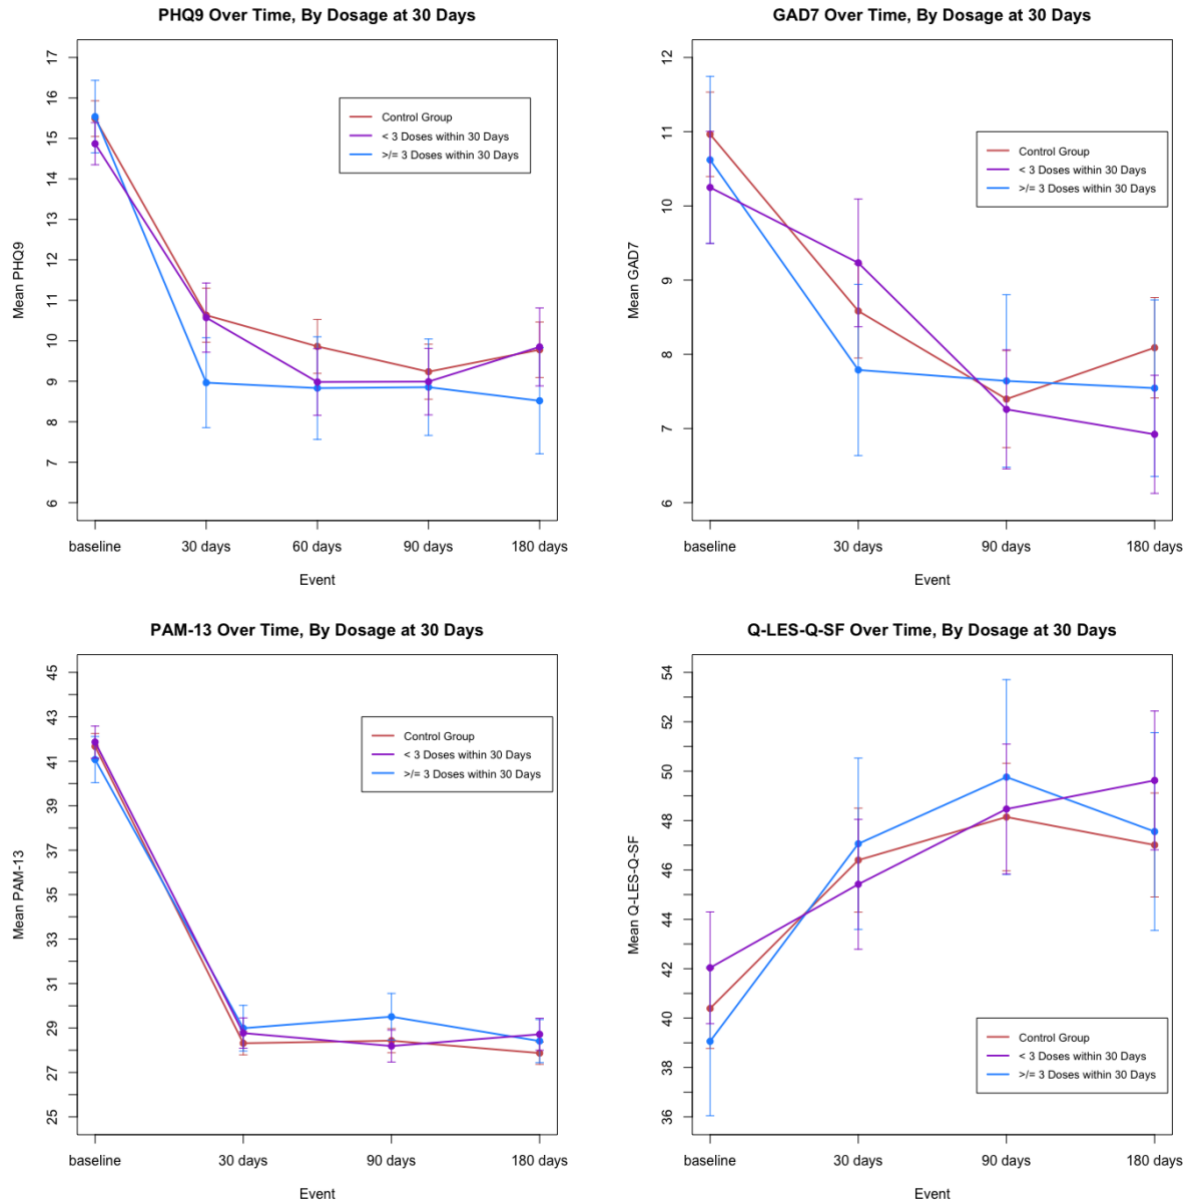

- \* Figures show the mean PHQ-9, GAD-7, PAM-13, and Q-LES-Q-SF scores and 95% confidence intervals at 0, 30, 90, and 180 days (and 60 days for PHQ-9 score) for controls, intervention patients receiving  $< 3$  sessions and intervention patients receiving  $\geq 3$  sessions within 30 days of hospital discharge.
- † PHQ-9. Patient Health Questionnaire-9 is a nine item scale. A score of  $\geq 10$  indicates moderate depressive symptoms.<sup>16</sup>
- ‡ Q-LES-Q-SF. Quality of Life Enjoyment and Satisfaction Questionnaire Short Form is a 16 item scale indicating the degree of enjoyment and satisfaction experienced by subjects in various areas of daily functioning. The reported score is the sum of the question responses rescaled to 100. Higher scores indicate higher enjoyment and satisfaction.<sup>21</sup>
- \*\* GAD-7. Generalized Anxiety Disorder 7 is a 7 item scale. A score of  $\geq 10$  indicates possible clinically significant generalized anxiety and  $\geq 15$  indicates that treatment is probably warranted<sup>23</sup>
- † PAM-13. Patient Activation Measure 13 is a 13 item scale indicating the degree of patients' willingness and ability to take independent actions to manage their health and care. Raw scores converted to range from 0–100 with  $\leq 47.0$  not believing activation important; 47.1–55.1 indicating a lack of knowledge and confidence to take action; 55.2–67.0 beginning to take action; and  $\geq 67.1$  taking action.<sup>22</sup>

| Supplemental Table 3. Secondary Outcomes, Intention-to-Treat    |               |               |                     |               |               |                     |
|-----------------------------------------------------------------|---------------|---------------|---------------------|---------------|---------------|---------------------|
|                                                                 | 30 days       |               |                     | 90 days       |               |                     |
|                                                                 | control       | intervention  | p-value             | control       | intervention  | p-value             |
| Q-LES-Q-SF, <i>mean (SD)</i> †                                  | 51.94 (20.14) | 52.35 (19.59) | 0.836 <sup>††</sup> | 54.27 (21.61) | 54.67 (19.95) | 0.852 <sup>††</sup> |
| PHQ-9, <i>mean (SD)</i> *                                       | 10.56 (6.36)  | 10.00 (6.23)  | 0.357 <sup>††</sup> | 9.20 (6.50)   | 8.97 (6.16)   | 0.715 <sup>††</sup> |
| PAM-13, <i>mean (SD)</i> §                                      | 36.30 (13.76) | 37.63 (14.30) | 0.344 <sup>††</sup> | 36.30 (14.15) | 37.13 (15.06) | 0.581 <sup>††</sup> |
| GAD-7, <i>mean (SD)</i> ‡                                       | 8.58 (6.22)   | 8.69 (6.35)   | 0.873 <sup>††</sup> | 7.30 (6.22)   | 7.56 (6.12)   | 0.711 <sup>††</sup> |
| Do you have a Primary Care Provider (PCP)?, <i>mean (SD)</i> ** | 0.96 (0.20)   | 0.97 (0.18)   | 0.623 <sup>††</sup> | 0.96 (0.18)   | 0.96 (0.19)   | 0.954 <sup>††</sup> |
| Did you see your PCP in the last month?, <i>mean (SD)</i> **    | 0.64 (0.48)   | 0.61 (0.49)   | 0.617 <sup>††</sup> | 0.46 (0.50)   | 0.48 (0.50)   | 0.689 <sup>††</sup> |
| Did you discuss depression with PCP?, <i>mean (SD)</i> **       | 0.52 (0.50)   | 0.44 (0.50)   | 0.179 <sup>††</sup> | 0.41 (0.50)   | 0.52 (0.50)   | 0.169 <sup>††</sup> |
| Have you seen other doctors? <i>mean (SD)</i> **                | 0.53 (0.52)   | 0.58 (0.50)   | 0.291 <sup>††</sup> | 0.52 (0.51)   | 0.53 (0.51)   | 0.832 <sup>††</sup> |

#### Footnotes for Tables 3

- \* PHQ-9. Patient Health Questionnaire-9 is a nine item scale. A score of  $\geq 10$  indicates moderate depressive symptoms.<sup>16</sup>
- † Q-LES-Q-SF. Quality of Life Enjoyment and Satisfaction Questionnaire Short Form is a 16 item scale indicating the degree of enjoyment and satisfaction experienced by subjects in various areas of daily functioning. The reported score is the sum of the question responses rescaled to 100. Higher scores indicate higher enjoyment and satisfaction.<sup>21</sup>
- ‡ GAD-7. Generalized Anxiety Disorder 7 is a 7 item scale. A score of 10-14 indicates possible clinically significant generalized anxiety and  $\geq 15$  indicates that treatment is probably warranted.<sup>23</sup>
- § PAM-13. Patient Activation Measure 13 is a 13 item scale indicating the degree of patients' willingness and ability to take independent actions to manage their health and care. Raw scores converted to range from 0–100 with  $\leq 47.0$  not believing activation important; 47.1–55.1 indicating a lack of knowledge and confidence to take action; 55.2–67.0 beginning to take action; and  $\geq 67.1$  taking action.<sup>22</sup>
- \*\* Question shortened in the table. Full survey questions available.<sup>14</sup>
- †† Independent t-test
- ‡‡ Chi-squared

**Supplemental Table 4. Baseline Characteristics by Recruitment Site**

| Characteristic                    | BMC<br>(n = 653) |      | Mt. Auburn<br>(n = 56) |      | p-value   |
|-----------------------------------|------------------|------|------------------------|------|-----------|
| Women, n (%)                      | 431              | 66   | 36                     | 64.3 | 0.909     |
| Mean age, (SD)                    | 51               | 13.5 | 58.1                   | 15.5 | 0.001     |
| Race, n (%)                       |                  |      |                        |      |           |
| White non-Hispanic                | 196              | 30   | 45                     | 80.4 | p < 0.001 |
| Black non-Hispanic                | 304              | 46.6 | 3                      | 5.4  | p < 0.001 |
| Hispanic                          | 121              | 18.5 | 5                      | 8.9  | 0.115     |
| Other race                        | 89               | 13.6 | 5                      | 8.9  | p < 0.001 |
| Income, n (%)                     |                  |      |                        |      |           |
| < \$10,000                        | 84               | 12.9 | 4                      | 7.1  | 0.301     |
| \$10,000 - \$19,999               | 125              | 19.1 | 6                      | 10.7 | 0.168     |
| \$20,000 - \$49,999               | 102              | 15.6 | 5                      | 8.9  | 0.251     |
| >= \$50,000                       | 56               | 8.6  | 21                     | 37.5 | p < 0.001 |
| No personal income                | 49               | 7.5  | 0                      | 0    | 0.064     |
| Refused                           | 89               | 13.6 | 15                     | 26.8 | 0.013     |
| Did not know                      | 146              | 22.4 | 5                      | 8.9  | 0.029     |
| Education, n (%)                  |                  |      |                        |      |           |
| Less than high school             | 29               | 4.4  | 1                      | 1.8  | 0.548     |
| Some high school                  | 87               | 13.3 | 0                      | 0    | 0.007     |
| High School Graduate or GED       | 248              | 38   | 10                     | 17.9 | 0.004     |
| Some college                      | 199              | 30.5 | 16                     | 28.6 | 0.884     |
| 4-year college graduate or higher | 89               | 13.6 | 29                     | 51.8 | p < 0.001 |
| Health Literacy, n (%)†           |                  |      |                        |      |           |
| Grade 3 or below                  | 3                | 0.5  | 0                      | 0    | 1         |
| Grade 4 to 6                      | 20               | 3.1  | 0                      | 0    | 0.364     |
| Grade 7 to 8                      | 101              | 15.5 | 1                      | 1.8  | 0.009     |
| Grade 9 or above                  | 388              | 59.4 | 40                     | 71.4 | 0.105     |
| Employment, n (%)                 |                  |      |                        |      |           |
| Full-time                         | 122              | 18.7 | 14                     | 25   | 0.329     |
| Part-time                         | 57               | 8.7  | 8                      | 14.3 | 0.254     |
| Home-maker                        | 9                | 1.4  | 1                      | 1.8  | 1         |
| Student                           | 7                | 1.1  | 0                      | 0    | 0.941     |
| Retired                           | 94               | 14.4 | 20                     | 35.7 | p < 0.001 |
| Disabled                          | 231              | 35.4 | 8                      | 14.3 | 0.002     |
| Unemployed                        | 114              | 17.5 | 4                      | 7.1  | 0.072     |
| Other‡                            | 18               | 2.8  | 1                      | 1.8  | 1         |
| Homeless in past 6 months         | 52               | 8    | 0                      | 0    | NA        |
| Mean PHQ-9, (SD) ††               | 15               | 4.3  | 14                     | 3.2  | 0.001     |
| Major depressive disorder ‡‡      | 202              | 30.9 | 4                      | 7.1  | 0.127     |
| Q-LES-Q-SF score**, mean (SD)     | 46               | 15.8 | 48                     | 16.7 | 0.309     |
| Marital Status, n (%)             |                  |      |                        |      |           |

|                                    |     |      |    |      |           |
|------------------------------------|-----|------|----|------|-----------|
| Married                            | 127 | 19.4 | 24 | 42.9 | 0.001     |
| Divorced                           | 133 | 20.4 | 8  | 14.3 | 0.226     |
| Separated                          | 46  | 7    | 1  | 1.8  | 0.012     |
| Widowed                            | 50  | 7.7  | 5  | 8.9  | 0.751     |
| Single w/o partner                 | 176 | 27   | 15 | 26.8 | 0.979     |
| Single with partner                | 124 | 19   | 3  | 5.4  | p < 0.001 |
| CAGE score, mean (SD)              | 2   | 42.8 | NA | NA   | NA        |
| DAST-10 score, mean (SD)           | 3   | 9.8  | 0  | NA   | NA        |
| GAD-7 score, mean (SD)             | 11  | 5.6  | 8  | 5.0  | p < 0.001 |
| History of Clinical Depression     | 403 | 61.7 | 34 | 60.7 | 0.874     |
| Medication for Depression          | 239 | 36.6 | 24 | 42.9 | 0.492     |
| Previous Medication for Depression | 277 | 42.4 | 28 | 50   | 0.669     |
| Relaxation                         |     |      |    |      |           |
| Chiropractor                       | 56  | 8.6  | 6  | 10.7 | 0.628     |
| Acupuncture                        | 31  | 4.7  | 1  | 1.8  | 0.134     |
| Massage                            | 60  | 9.2  | 8  | 14.3 | 0.302     |
| Deep Breathing                     | 244 | 37.4 | 32 | 57.1 | 0.004     |
| Meditation                         | 158 | 24.2 | 24 | 42.9 | 0.009     |
| Yoga                               | 51  | 7.8  | 9  | 16.1 | 0.111     |
| Diet/Nutrition to Improve Mood     | 155 | 23.7 | 16 | 28.6 | 0.419     |
| Exercise                           | 296 | 45.3 | 30 | 53.6 | 0.264     |
| Book About Depression              | 66  | 10.1 | 6  | 10.7 | 0.412     |
| Support Group                      | 68  | 10.4 | 11 | 19.6 | 0.396     |
| Prayer                             | 447 | 68.5 | 28 | 50   | 0.008     |
| Other Relaxation                   | 284 | 43.5 | 37 | 66.1 | 0.002     |
| PAM-13 score, mean (SD)            | 42  | 56.3 | 41 | 45.5 | 0.282     |
| Q-LES-Q-SF score**, mean (SD)      | 45  | 15.8 | 48 | 16.7 | 0.185     |

\* Not all column percentages sum to 100% when missing values are present.

† Health literacy categories correspond to total REALM scores of grade 3 or below (REALM score, 0–18), grade 4 to 6 (REALM score, 19–44), grade 7 to 8 (REALM score, 45–60), and grade 9 or above (REALM score, 61–66). (ref – same as in the manuscript)

‡ The most common responses under “other” are not working due to a leave of absence, due to recent release from prison, due to medical leave, due to depression, due to medical reasons, and due to unspecified reasons.

\*\* Q-LES-Q-SF = Quality of Life Enjoyment and Satisfaction Questionnaire. The reported score is the sum of the question responses rescaled (to 100).

†† PHQ-9 = Patient Health Questionnaire-9 (ref – same as in the manuscript)

‡‡ Determined by clinical interview by licensed mental health counselor



**Supplemental Table 5. ITT Results using MANOVA test**

|                                | 30 days       |               |         |
|--------------------------------|---------------|---------------|---------|
|                                | control       | intervention  | p-value |
| Q-LES-Q-SF, <i>mean (SD)</i> † | 51.94 (20.14) | 52.35 (19.59) | 0.570   |
| PHQ-9, <i>mean (SD)</i> *      | 10.56 (6.36)  | 10.00 (6.23)  | 0.307   |
| PAM-13, <i>mean (SD)</i> §     | 36.30 (13.76) | 37.63 (14.30) | 0.930   |
| GAD-7, <i>mean (SD)</i> ‡      | 8.58 (6.22)   | 8.69 (6.35)   | 0.474   |

## Supplemental Table 6. Complier Average Treatment Effects for Primary Outcomes at 30 and 90 Days

| Compliance                   | Outcome                 | Coefficient | Std. Error | P-Value |
|------------------------------|-------------------------|-------------|------------|---------|
| Continuous Compliance        |                         |             |            |         |
|                              | Readmissions, 30 days   | 0.05        | 0.16       | 0.742   |
|                              | Readmissions, 90 days   | 0.09        | 0.06       | 0.108   |
|                              | Reutilizations, 30 days | 0.18        | 0.11       | 0.096   |
|                              | Reutilizations, 90 days | 0.07        | 0.04       | 0.071   |
| Binary Compliance, >= 1 Dose |                         |             |            |         |
|                              | Readmissions, 30 days   | 0.12        | 0.38       | 0.742   |
|                              | Readmissions, 90 days   | 0.47        | 0.29       | 0.105   |
|                              | Reutilizations, 30 days | 0.42        | 0.25       | 0.093   |
|                              | Reutilizations, 90 days | 0.37        | 0.2        | 0.068   |

Complier average treatment effects were calculated by instrumenting for treatment compliance with treatment assignment and using two-stage regression, with an OLS model for the first stage and a Poisson for the second stage. "Continuous compliance" uses a continuous measure of dosage, from zero doses up to 12 doses. "Binary Compliance" defines compliance as receiving at least one dose of the intervention.

## Supplemental Table 7. Readmission & Reutilization Rates by Each Additional Session

30-day Readmission & Reutilization Rates by # Sessions

| # of Sessions | control | 1                       | 2                       | 3                       | 4                       |
|---------------|---------|-------------------------|-------------------------|-------------------------|-------------------------|
| N             | 343     | 61                      | 99                      | 52                      | 45                      |
| Readmit. Rate | 0.10    | 0.20                    | 0.11                    | 0.06                    | 0.00                    |
| IRR (95% CI)  |         | 2.04<br>( 1.01 , 3.85 ) | 1.15<br>( 0.56 , 2.21 ) | 0.6<br>( 0.14 , 1.67 )  | 0<br>( NA , NA )        |
| Reutil. Rate  | 0.24    | 0.48                    | 0.31                    | 0.25                    | 0.16                    |
| IRR (95% CI)  |         | 1.99<br>( 1.28 , 3 )    | 1.31<br>( 0.85 , 1.96 ) | 1.05<br>( 0.56 , 1.81 ) | 0.65<br>( 0.27 , 1.31 ) |

90-day Readmission & Reutilization Rates by Dosage

| # of Sessions | control | 1                       | 2                      | 3                       | 4                       | 5                       | 6                       | 7                       | 8                       | 9                       | 10                      | 11                      |
|---------------|---------|-------------------------|------------------------|-------------------------|-------------------------|-------------------------|-------------------------|-------------------------|-------------------------|-------------------------|-------------------------|-------------------------|
| N             | 333     | 44                      | 27                     | 23                      | 36                      | 26                      | 22                      | 24                      | 20                      | 17                      | 14                      | 9                       |
| Readmit. Rate | 0.21    | 0.36                    | 0.19                   | 0.57                    | 0.33                    | 0.54                    | 0.14                    | 0.17                    | 0.1                     | 0.06                    | 0.14                    | 0                       |
| IRR (95% CI)  |         | 1.71<br>( 0.96 , 2.85 ) | 0.87<br>( 0.3 , 1.94 ) | 2.65<br>( 1.4 , 4.62 )  | 1.56<br>( 0.81 , 2.77 ) | 2.53<br>( 1.37 , 4.34 ) | 0.64<br>( 0.16 , 1.71 ) | 0.78<br>( 0.24 , 1.88 ) | 0.47<br>( 0.08 , 1.49 ) | 0.28<br>( 0.02 , 1.24 ) | 0.67<br>( 0.11 , 2.13 ) | 0<br>( 0 , 0 )          |
| Reutil. Rate  | 0.57    | 1                       | 0.74                   | 1                       | 0.75                    | 1.08                    | 0.68                    | 0.54                    | 0.25                    | 0.47                    | 0.36                    | 0.22                    |
| IRR (95% CI)  |         | 1.76<br>( 1.25 , 2.42 ) | 1.31<br>( 0.8 , 2.02 ) | 1.76<br>( 1.11 , 2.66 ) | 1.32<br>( 0.86 , 1.94 ) | 1.9<br>( 1.25 , 2.77 )  | 1.2<br>( 0.68 , 1.96 )  | 0.95<br>( 0.52 , 1.61 ) | 0.44<br>( 0.16 , 0.96 ) | 0.83<br>( 0.37 , 1.57 ) | 0.63<br>( 0.22 , 1.37 ) | 0.39<br>( 0.06 , 1.22 ) |

**Supplemental Table 8. As-Treated Analysis - Secondary Outcomes by Number of Sessions of RED-DIntervention**

| 30-Day Secondary Outcomes by # Sessions |                            |                     |                       |                      |
|-----------------------------------------|----------------------------|---------------------|-----------------------|----------------------|
|                                         | <i>Dependent variable:</i> |                     |                       |                      |
|                                         | PHQ-9                      | GAD-7               | Q-LES-Q-SF            | PAM-13               |
|                                         | (1)                        | (2)                 | (3)                   | (4)                  |
| # of Sessions                           | -1.043***<br>(0.392)       | -0.646<br>(0.441)   | 2.105*<br>(1.154)     | -0.002<br>(0.369)    |
| Age                                     | -0.030<br>(0.036)          | -0.080**<br>(0.039) | -0.331***<br>(0.107)  | -0.116***<br>(0.035) |
| Gender                                  | -1.715*<br>(1.033)         | -1.238<br>(1.164)   | 5.416*<br>(3.052)     | 0.443<br>(1.008)     |
| MDD                                     | 5.194***<br>(0.951)        | 5.377***<br>(1.080) | -15.530***<br>(2.813) | -1.141<br>(0.913)    |
| Observations                            | 141                        | 116                 | 136                   | 133                  |
| Adjusted R <sup>2</sup>                 | 0.225                      | 0.206               | 0.227                 | 0.057                |

Note: \*p<0.1; \*\*p<0.05; \*\*\*p<0.01

| 90-Day Secondary Outcomes by # Sessions |                            |                     |                       |                     |
|-----------------------------------------|----------------------------|---------------------|-----------------------|---------------------|
|                                         | <i>Dependent variable:</i> |                     |                       |                     |
|                                         | PHQ-9                      | GAD-7               | Q-LES-Q-SF            | PAM-13              |
|                                         | (1)                        | (2)                 | (3)                   | (4)                 |
| # of Sessions                           | -0.257<br>(0.160)          | -0.067<br>(0.199)   | 0.949*<br>(0.551)     | 0.310*<br>(0.157)   |
| Age                                     | -0.057<br>(0.039)          | -0.064<br>(0.048)   | -0.115<br>(0.134)     | -0.098**<br>(0.038) |
| Gender                                  | 0.310<br>(1.037)           | -1.548<br>(1.239)   | 0.084<br>(3.552)      | -0.387<br>(1.010)   |
| MDD                                     | 5.843***<br>(0.961)        | 3.889***<br>(1.171) | -16.344***<br>(3.291) | -1.024<br>(0.940)   |
| Observations                            | 135                        | 105                 | 132                   | 133                 |
| Adjusted R <sup>2</sup>                 | 0.234                      | 0.108               | 0.160                 | 0.050               |

Note: \*p<0.1; \*\*p<0.05; \*\*\*p<0.01

Tables show coefficients, standard errors, and p-value thresholds for OLS regressions of 30- and 90-day secondary outcomes (PHQ-9, GAD-7, Q-LES-Q-SF, PAM-13) on the number of RED-D sessions completed, controlling for those variables found to differ across subjects with low versus

high number of sessions (age, gender, and major depressive disorder).
